# Supplementary material for: Analysis of the sericin1 promoter and assisted detection of exogenous gene expression efficiency in the silkworm Bombyx mori L
Source: PubMed Central journal article supplement (PMC4319154; doi:10.1038/srep08301), 2015-02-06
Supplement: srep08301-s1.pdf [file srep08301-s1.pdf]

**Analysis of the *sericin1* promoter and assisted detection of exogenous  
gene expression efficiency in the silkworm *Bombyx mori* L.**

Lupeng Ye<sup>1</sup>, Qiujie Qian<sup>1</sup>, Yuyu Zhang<sup>1</sup>, Zhengying You<sup>1</sup>, Jiaqian Che<sup>1</sup>, Jia Song<sup>1</sup> &

Boxiong Zhong<sup>1\*</sup>

<sup>1</sup>College of Animal Sciences, Zhejiang University, Hangzhou 310058, P. R. China

\*Corresponding author. Tel:/Fax: +86-571-86971302; E-mail: [bxzhong@zju.edu.cn](mailto:bxzhong@zju.edu.cn)

**Table S1. Statistical analysis of TFBSs on the three regions of the *Ser1* promoter**

| Proximal region of the <i>Ser1</i><br>promoter |                      | Middle region of the <i>Ser1</i><br>promoter |                      | Distal region of the <i>Ser1</i><br>promoter |                       |
|------------------------------------------------|----------------------|----------------------------------------------|----------------------|----------------------------------------------|-----------------------|
| Potential<br>TFBSs                             | Number<br>(total=41) | Potential<br>TFBSs                           | Number<br>(total=87) | Potential<br>TFBSs                           | Number<br>(total=105) |
| BR-C Z                                         | 4                    | BR-C Z                                       | 2                    | BR-C Z                                       | 12                    |
| Croc                                           | 2                    | Croc                                         | 2                    | HSF                                          | 39                    |
| HSF                                            | 13                   | HSF                                          | 42                   | Dfd                                          | 18                    |
| Dfd                                            | 16                   | Dfd                                          | 16                   | Ttk                                          | 1                     |
| Bcd                                            | 1                    | Bcd                                          | 3                    | Hb                                           | 25                    |
| Ttk                                            | 1                    | Ttk                                          | 1                    | dl                                           | 3                     |
| Hb                                             | 4                    | Hb                                           | 10                   | CF2-II                                       | 5                     |
|                                                |                      | Ftz                                          | 3                    | GCM                                          | 2                     |
|                                                |                      | Abd-B                                        | 2                    |                                              |                       |
|                                                |                      | dl                                           | 1                    |                                              |                       |
|                                                |                      | STAT                                         | 2                    |                                              |                       |
|                                                |                      | CF2-II                                       | 2                    |                                              |                       |
|                                                |                      | Su(H)                                        | 1                    |                                              |                       |

**Table S2. Outcome of transgenesis**

| <b>Transgenic strains</b> | <b>Microinjected eggs (G0)</b> | <b>Hatched eggs (Hatching rate, %)</b> | <b>G1 generation broods</b> | <b><i>EGFP</i>-positive broods</b> | <b>Percentage of transgenic efficiency (%)</b> |
|---------------------------|--------------------------------|----------------------------------------|-----------------------------|------------------------------------|------------------------------------------------|
| pBL1F                     | 1751                           | 89 (5.1)                               | 47                          | 8                                  | 17.0                                           |
| pBL2F                     | 2335                           | 84 (3.6)                               | 60                          | 8                                  | 13.3                                           |
| pBL4F                     | 672                            | 22 (3.3)                               | 16                          | 2                                  | 12.5                                           |
| pBC2R                     | 627                            | 63 (10.0)                              | 50                          | 8                                  | 16.0                                           |
| pBC3R                     | 1320                           | 154 (11.7)                             | 21                          | 5                                  | 23.8                                           |
| pBC4R                     | 950                            | 96 (10.1)                              | 40                          | 6                                  | 15.0                                           |

**Table S3. Integration sites of transgenic silkworms**

| Transgenic strains | Hit chromosome position | Hit scaffold position | Distribution of <i>piggyBac</i> insertions in genes | 5'-flanking genomic DNA sequence | Vector          | 3'-flanking genomic DNA sequence |
|--------------------|-------------------------|-----------------------|-----------------------------------------------------|----------------------------------|-----------------|----------------------------------|
| pBC2R1             | Chr. 16                 | Bm_scaf 39            | Exon                                                | TTTAGATCTACCATTAT <u>TTAA</u>    | <i>piggyBac</i> | <u>TTAA</u> AAGAGGCTGGCGACA      |
| pBC2R2             | Chr. 21                 | Bm_scaf 7             | Intergenic                                          | TCTGTATTTGAGTTCAT <u>TTAA</u>    | <i>piggyBac</i> | <u>TTAA</u> GGGCTGGGCAAACGT      |
| pBC2R3             | Chr. 25                 | Bm_scaf 57            | Intergenic                                          | CGAAATTATATACCTCAT <u>TTAA</u>   | <i>piggyBac</i> | <u>TTAA</u> TAAGCTCTAAATTTTA     |
| pBC2R4             | Chr. 3                  | Bm_scaf 17            | Intron                                              | AATTAATACTTATTCAT <u>TTAA</u>    | <i>piggyBac</i> | <u>TTAA</u> TAAGTTTTACGAAGTT     |
| pBC2R5             | Chr. 21                 | Bm_scaf 7             | Intergenic                                          | ATAAGTATATCGTTGCT <u>TTAA</u>    | <i>piggyBac</i> | <u>TTAA</u> TATAATGTTAACAAAG     |
| pBC2R6             | Chr. 1                  | Bm_scaf 8             | Intergenic                                          | TTACTTGATTAATTCAC <u>TTAA</u>    | <i>piggyBac</i> | <u>TTAA</u> CGGCGCTCATTACATA     |
| pBC2R7             | Chr. 10                 | Bm_scaf 253           | Exon                                                | ACTTTCTGAAGGGTCT <u>TTAA</u>     | <i>piggyBac</i> | <u>TTAA</u> ACAATGATTTCAATAA     |

**Table S4. Primers for study**

| <b>Target genes</b>       | <b>Forward primers (5'→3')</b> | <b>Reverse primers (5'→3')</b> | <b>Purpose</b>                             |
|---------------------------|--------------------------------|--------------------------------|--------------------------------------------|
| <i>Ser1</i> promoter      | GCACACACACTACATACCAT           | GTTGGCGGTCTTTGGATCG            | 0.5 kb length <i>Ser1</i> promoter cloning |
| <i>Ser1</i> promoter      | ATGCTCGTCTGTCAAGGGTCT          | GTTGGCGGTCTTTGGATCG            | 2 kb length <i>Ser1</i> promoter cloning   |
| <i>Ser1</i> promoter      | CGGCTTCCAACGCCTTTGTTATT        | GTTGGCGGTCTTTGGATCG            | 4 kb length <i>Ser1</i> promoter cloning   |
| <i>FLuc</i>               | TAAAGACTTCAAGCGGTCAACTATG      | TTATGTCCGGTTATGTAAACAATCC      | qRT-PCR                                    |
| <i>RLuc</i>               | TTGGCACCTTCAACAATAGCAT         | GCCTCGTGAAATCCCGTTAGT          | qRT-PCR                                    |
| <i>EGFP</i>               | AGCAGAAGAACGGCATCAAGGTG        | CGCTTCTCGTTGGGGTCTTTG          | qRT-PCR                                    |
| <i>Rp49</i>               | TGCTCCCAAATGGATTCCGTAAG        | CACGATCAGCTTCCGCTTCTTC         | Reference gene for qRT-PCR                 |
| <i>piggyBac</i> left arm  | CTTACCGCATTGACAAGCACGCC        | GTTCTTTAGACGATGAGCATATCCT      | Inverse PCR                                |
| <i>piggyBac</i> right arm | TATCTTTAACGTACGTCACAATATG      | GGTCTGTATATCGAGGTTTATTTA       | Inverse PCR                                |
